# Supplementary material for: Bifacial dye-sensitized solar cells: A strategy to enhance overall efficiency based on transparent polyaniline electrode
Source: PubMed Central journal article supplement (PMC3916787; doi:10.1038/srep04028), 2014-02-07
Supplement: srep04028-s1.pdf [file srep04028-s1.pdf]

# Supporting Information

for *Scientific Report.*, DOI:10.1038/srep (2014).

## **Bifacial dye-sensitized solar cells: A strategy to enhance overall efficiency based on transparent polyaniline electrode**

Jihuai Wu<sup>1\*</sup>, Yan Li<sup>1</sup>, Qunwei Tang<sup>2\*</sup>, Gentian Yue<sup>1</sup>, Jianming Lin<sup>1</sup>, Miaoliang Huang<sup>1</sup> & Lijian Meng<sup>3</sup>

<sup>1</sup> Institute of Materials Physical Chemistry, Huaqiao University, 362021 Quanzhou, P. R. China;

<sup>2</sup> Institute of Materials Science and Engineering, Ocean University of China, Qingdao 266100, P.

R. China; <sup>3</sup> Departamento de Física, Instituto Superior de Engenharia do Porto, Instituto Politécnico do Porto, Rua Dr. António Bernardino de Almeida 431, 4200-072 Porto, Portugal, Centro de Física, Universidade do Minho, 4800-058 Guimarães, Portugal.

### **Figures S1-S6**

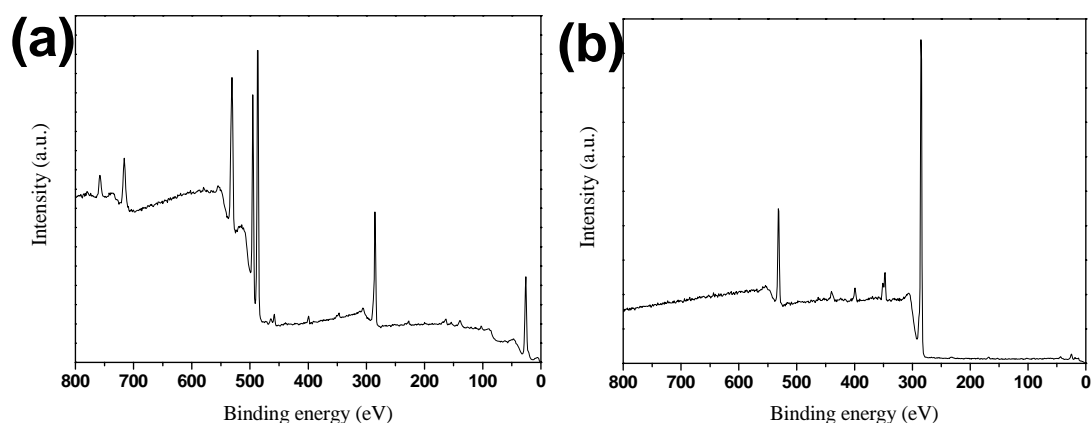

Figure S1 | XPS spectra for (a) bared FTO and (b) 4-ATP modified FTO substrates.

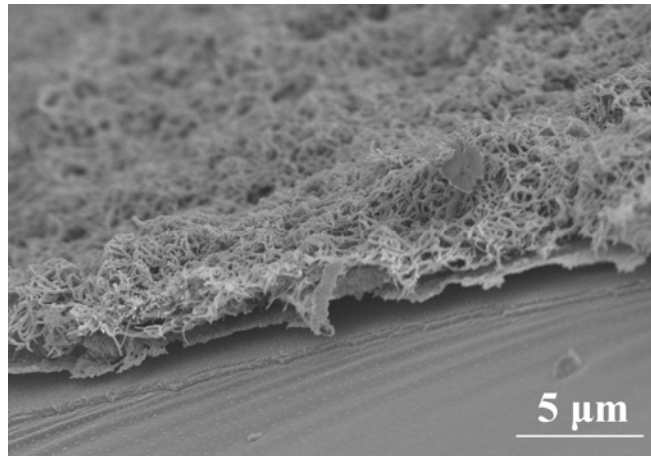

Figure S2 | Cross-sectional SEM image of PANI (ECD) on FTO glass substrate.

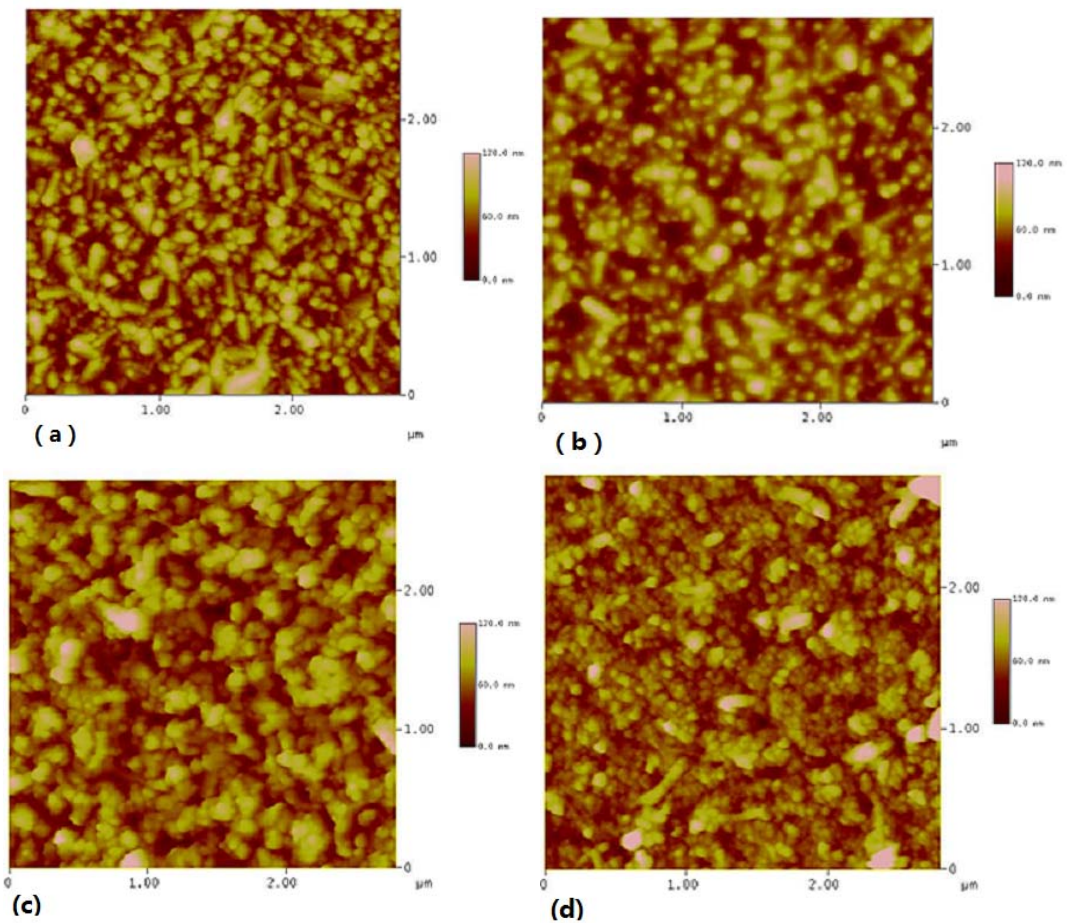

Figure S3 | AFM images of (a) bare FTO substrate, (b) 4-ATP/FTO, (c) PANI (CD) on FTO, (d) 4-ATP/PANI (CD) on FTO.

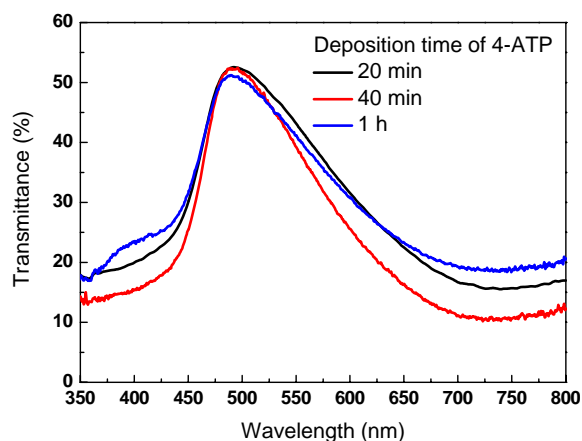

Figure S4 | UV-vis transmittance spectra of FTO supported 4-ATP/PANI (CD) electrode at various deposition time of 4-ATP. The deposition time of PANI is 5 h.

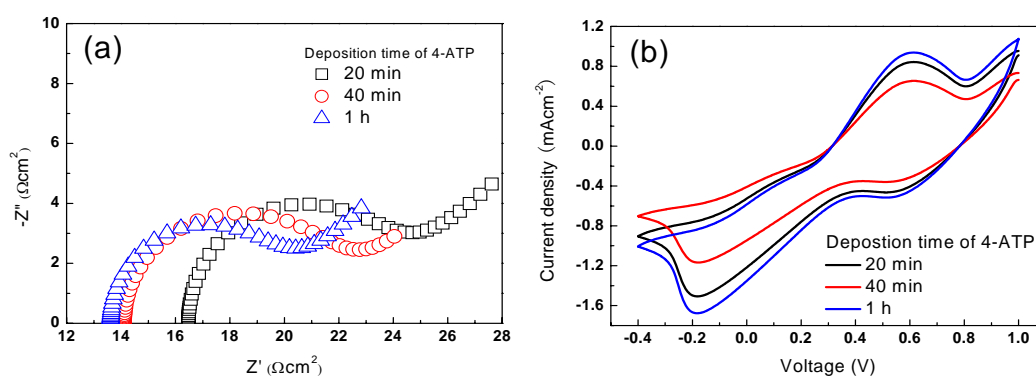

Figure S5 | (a) Nyquist plots and (b) cyclic voltammograms of 4-ATP/PANI (CD) electrodes at various deposition times of 4-ATP. The deposition time of PANI is 5 h. The Nyquist plots were obtained at open circuit voltage under irradiation of  $100 \text{ mW}\cdot\text{cm}^{-2}$ .

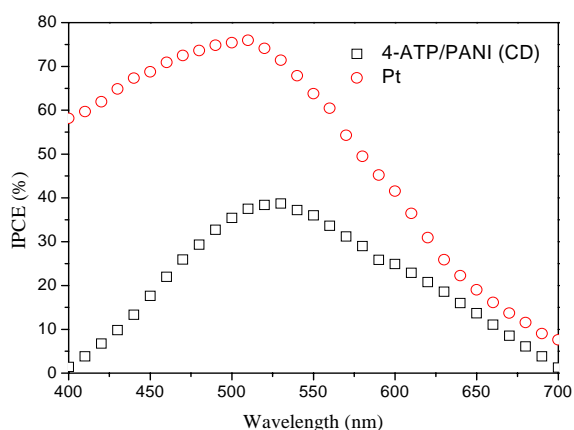

Figure S6 | IPCE curves of DSSCs from 4-ATP/PANI (CD) and Pt counter electrodes. The deposition time of PANI is 5 h.
